# Supplementary material for: Luciferase-Based Screen for Post-translational Control Factors in the Regulation of the Pseudo-Response Regulator PRR7
Source: PubMed Central journal article supplement (PMC6540683; doi:10.3389/fpls.2019.00667), 2019-05-22
Supplement: Data_Sheet_1.pdf [file Data_Sheet_1.pdf]

Supplementary Table S1. Primers used for qRT-PCR in this study

| <b>Gene</b>  | <b>Forward (5' -&gt; 3')</b> | <b>Reverse (5' -&gt; 3')</b> |
|--------------|------------------------------|------------------------------|
| <i>CCA1</i>  | TCTGGTTATTAAGACTCGGAAGCCAT   | CTTCTGCCATGCTCTACCATAAAGCC   |
| <i>PRR9</i>  | CCTTGAAGATACTGATGAAACTTGTG   | TGTAATTGATAGCCTGAGCACCCTT    |
| <i>PRR7</i>  | ACGACTGAGAACAACGCTTTCACAAA   | ACATGGACAAGGTTATAGGAGGCATG   |
| <i>GI</i>    | AATTCAGCACGCGCCTATTG         | GTTGCTTCTGCTGCAGGAACTT       |
| <i>PIF4</i>  | ACCTCAGAGACGGTTAAGCC         | TGGAGGAGGCATGACTTGAG         |
| <i>U-box</i> | TGCGCTGCCAGATAATACTACTATT    | TGCTGCCCAACATCAGGTT          |

Primers used for plasmid construction in this study

| <b>Gene</b>                 | <b>Forward (5' -&gt; 3')</b>       | <b>Reverse (5' -&gt; 3')</b>    |
|-----------------------------|------------------------------------|---------------------------------|
| <i>PRR7pro</i>              | ATCGATATCCCTTTTGCAGTCACGATGAT      | GTAGATATCCACACCAACTCTGCTTCGCT   |
| <i>PRR7</i>                 | GCTACCATGGATGAATGCTAATGAGGAG<br>GG | TAGCCCATGGCGCTATCCTCAATGTTTTTAA |
| <i>TAP-ELF3</i>             | CACCGCATGAAGAGAGGGAAAGATGAG<br>G   | TTAAGGCTTAGAGGAGTCA             |
| <i>HA-ELF3</i>              | CACCATGAAGAGAGGGAAAGAT             | TTAAGGCTTAGAGGAGTCA             |
| <i>ELF3<sup>A37T</sup></i>  | AGAAACAAGATGACTCTTTATGAGCAG        | CTGCTCATAAAGAGTCATCTTGTTTCT     |
| <i>ELF3<sup>P666S</sup></i> | ATAAAGGTGGTATCTCACAAACGCAAAG       | CTTTGCGTTGTGAGATACCACCTTTAT     |
| <i>ELF4</i>                 | CACCATGAAGAGGAACGGCGAG             | TTAAGCTCTAGTTCCGGC              |
| <i>LUX</i>                  | CACCATGGGAGAGGAAGTACAAA            | ATTCTCATTTGCGCTTCC              |
| <i>GI</i>                   | CACCATGGCTAGTTCATCTTCA             | TTATTGGGACAAGGATATAG            |
| <i>PIF4</i>                 | CACCATGGAACACCAAGGTTGGAG           | CTAGTGGTCCAACGAGAACCG           |
